# Supplementary material
Source: PubMed Central journal article supplement (PMC10370340)
Supplement: ehp12155.smcontents.508.pdf [file ehp12155.smcontents.508.pdf]

**Note to readers with disabilities:** *EHP* strives to ensure that all journal content is accessible to all readers. However, some figures and Supplemental Material published in *EHP* articles may not conform to [508 standards](#) due to the complexity of the information being presented. If you need assistance accessing journal content, please contact [ehp508@niehs.nih.gov](mailto:ehp508@niehs.nih.gov). Our staff will work with you to assess and meet your accessibility needs within 3 working days.

### **Supplemental Material**

#### **Urinary Glyphosate Concentrations among Pregnant Participants in a Randomized, Crossover Trial of Organic and Conventional Diets**

Carly Hyland, Meredith Spivak, Lianne Sheppard, Bruce P. Lanphear, Michael Antoniou, Maria Ospina, Antonia M. Calafat, and Cynthia L. Curl

#### **Table of Contents**

##### **Food Log – Week 1**

##### **Protocol for Scoring Participants' Self-Reported Dietary Compliance Records**

**Table S1.** Change in urinary glyphosate concentrations from conventional diet to organic diet in secondary analyses to restricted to participants who complied with intervention based on *a priori* criteria, stratified by far (> 5 km) vs. near (< 0.5 km) field residential location.

**Table S2.** Urinary glyphosate concentrations from NHANES and previous studies of pregnant women ( $\mu\text{g/L}$ ).

**Table S3.** Specific gravity-adjusted urinary glyphosate concentrations on log-log scale and percent change between conventional and organic week among 39 pregnant participants in a randomized crossover conventional vs organic dietary intervention trial. Data used for Figures 3 and 4.
